# Supplementary material for: How human factors affect escalation of care: a protocol for a qualitative evidence synthesis of studies
Source: PubMed Central journal article supplement (PMC6500321; doi:10.1136/bmjopen-2018-025969), 2019-04-08
Supplement: bmjopen-2018-025969.draft_revisions.pdf [file bmjopen-2018-025969.draft_revisions.pdf]

# BMJ Open

BMJ Open is committed to open peer review. As part of this commitment we make the peer review history of every article we publish publicly available.

When an article is published we post the peer reviewers' comments and the authors' responses online. We also post the versions of the paper that were used during peer review. These are the versions that the peer review comments apply to.

The versions of the paper that follow are the versions that were submitted during the peer review process. They are not the versions of record or the final published versions. They should not be cited or distributed as the published version of this manuscript.

BMJ Open is an open access journal and the full, final, typeset and author-corrected version of record of the manuscript is available on our site with no access controls, subscription charges or pay-per-view fees (<http://bmjopen.bmj.com>).

If you have any questions on BMJ Open's open peer review process please email [info.bmjopen@bmj.com](mailto:info.bmjopen@bmj.com)

# BMJ Open

## How human factors affect escalation of care: a protocol for a systematic review and thematic synthesis of qualitative studies

|                               |                                                                                                                                                                                                                                                                                                                                                                                                        |
|-------------------------------|--------------------------------------------------------------------------------------------------------------------------------------------------------------------------------------------------------------------------------------------------------------------------------------------------------------------------------------------------------------------------------------------------------|
| Journal:                      | <i>BMJ Open</i>                                                                                                                                                                                                                                                                                                                                                                                        |
| Manuscript ID                 | bmjopen-2018-025969                                                                                                                                                                                                                                                                                                                                                                                    |
| Article Type:                 | Protocol                                                                                                                                                                                                                                                                                                                                                                                               |
| Date Submitted by the Author: | 10-Aug-2018                                                                                                                                                                                                                                                                                                                                                                                            |
| Complete List of Authors:     | Ede, Jody; John Radcliffe Hospital, University of Oxford Westgate, Verity ; University of Oxford, Nuffield Department of Clinical Neurosciences<br>Darbyshire, Julie; University of Oxford, NDCN<br>Petricic, Tatjana; University of Oxford Health Care Libraries, Cairns Library<br>Watkinson, Peter; Oxford University Hospitals NHS Trust, Kadoorie Centre for Critical Care research and Education |
| Keywords:                     | Failure to rescue, Escalation of care, Human factors, Qualitative, Thematic synthesis, Systematic Review                                                                                                                                                                                                                                                                                               |
|                               |                                                                                                                                                                                                                                                                                                                                                                                                        |

SCHOLARONE™  
Manuscripts

1  
2  
3  
4 1 Title Page5  
6 2 **How human factors affect escalation of care: a**  
7  
8 3 **protocol for a systematic review and thematic**  
9  
10 4 **synthesis of qualitative studies**  
11  
12 513 6 Corresponding Author Jody Ede University of Oxford [Jody.ede@ndcn.ox.ac.uk](mailto:Jody.ede@ndcn.ox.ac.uk)14 7 Verity Westgate University of Oxford [verity.westgate@ndcn.ox.ac.uk](mailto:verity.westgate@ndcn.ox.ac.uk)15 8 Tatjana Petrinic Oxford University Hospital NHS Trust [tatjana.petrinic@bodleian.ox.ac.uk](mailto:tatjana.petrinic@bodleian.ox.ac.uk)16 9 Julie Darbyshire University of Oxford [Julie.darbyshire@ndcn.ox.ac.uk](mailto:Julie.darbyshire@ndcn.ox.ac.uk)17 10 Peter Watkinson Associate Professor University of Oxford [peter.watkinson@ndcn.ox.ac.uk](mailto:peter.watkinson@ndcn.ox.ac.uk)18  
19  
20  
21  
22  
23  
24 12  
25 13 **“Supported by the NIHR Biomedical Research Centre, based at Oxford University Hospitals Trust,**  
26 14 **Oxford and the Wellcome Trust through the Health Innovation Challenge Fund. The views**  
27 15 **expressed are those of the author(s) and not necessarily those of the NHS, the NIHR or the**  
28 16 **Department of Health”**29 17  
30  
31 18 Word count: 126432 19 Keywords: Failure to rescue, escalation of care, human factors, qualitative, thematic, systematic  
33  
34  
35  
36  
37  
38  
39  
40  
41  
42  
43  
44  
45  
46  
47  
48  
49  
50  
51  
52  
53  
54  
55  
56  
57  
58  
59  
60

## 1 ABSTRACT

### 2 Introduction

3 Failure to rescue (FTR) is defined as mortality after complications during an in-hospital admission.  
4 Incidence of FTR varies between hospitals but has been estimated as 10.9% in high-volume hospitals  
5 and 13.3% in low-volume hospitals. Several national reports such as National Confidential Enquiry  
6 into Patient Outcomes and Death (NCEPOD) and NICE CG 50 emphasise this theme

7 For FTR to be avoided, there must be a successful escalation of care (EOC) initiated by bedside staff.  
8 Studies have found that Human Factors such as situational awareness, team working,  
9 communication and safety culture contribute to FTR. Understanding these human factors is essential  
10 to developing working systems that mitigate barriers and encourage facilitation of EOC. This  
11 qualitative systematic review is the first synthesis of what is known about the human factors that  
12 affect EOC.

### 13 Methods and Analysis

14 We will search MEDLINE (Ovid) and EMBASE (Ovid) for studies describing human factors that affect  
15 FTR and EOC. A search strategy was developed by two researchers assisted by a medical librarian.  
16 Only studies exploring EOC in hospital ward populations using qualitative data collection methods  
17 will be included. Screening will be conducted by two researchers from different professional  
18 backgrounds. Selected studies will be assessed for quality, rigor and limitations. Two researchers will  
19 extract and thematically synthesise codes using a piloted data extraction tool to develop analytical  
20 themes.

### 21 Ethics and dissemination

22 This systematic review will use available published literature and therefore no ethical approval is  
23 required. This systematic review will be limited by the quality of studies available and the rigor and  
24 reproducibility of study findings. This review will synthesise what is known about human factors and  
25 escalation of care, highlighting gaps within the literature. Results of this review will be published in  
26 peer reviewed journal, presented at conferences and publicised on social media.

### 27 TRIAL REGISTRATION

28 PROSPERO: (CRD42018104745)

### 29 ARTICLE SUMMARY

30 Strengths and Limitations of this study

- 31 • FTR is a common and significant problem in healthcare which affects patient mortality
- 32 • For FTR to be avoided, an escalation of care needs to occur. This efficacy of this can be  
33 positively or negatively affected by human factors
- 34 • This protocol ensures a comprehensive and unbiased search and analysis of qualitative  
35 studies exploring this phenomenon using best practice guidelines
- 36 • The results of this review will identify strengths and weaknesses of the literature in this  
37 area
- 38 • This review will highlight future research direction and address some of the identified  
39 weaknesses

40

## 1 INTRODUCTION

2 FTR is defined as the mortality rate of patients who suffer complications in hospital (1) . The  
3 incidence of FTR varies between hospitals but has been estimated as 10.9% in high-volume hospitals  
4 and 13.3% in low-volume hospitals. A proportion of patient deaths (32%) reported to the National  
5 Patient Safety Agency (NSPA) had failures surrounding diagnostic errors and deteriorations which  
6 were not adequately recognised (5). This theme is present in several national reports such as  
7 National Confidential Enquiry into Patient Outcomes and Death (NCEPOD) (3,6–8) and NICE CG 50  
8 (4).

9 For FTR to be avoided, bedside clinical staff must usually initiate successful escalation of care (EOC)  
10 (9). This staged process requires detection of deterioration, communication about deterioration, and  
11 medical actions following a senior review (3). Many factors affect this process such as situational  
12 awareness, team working, communication, safety culture and leadership (3,10–14). Understanding  
13 these human factors is essential to developing working systems that mitigate barriers and encourage  
14 facilitation.

15 As a primary outcome, this qualitative systematic review will identify the human factors which affect  
16 EOC in the acute hospital setting. It will summarise what is currently understood about the  
17 involvement of human factors and their implications for practice. As a secondary outcome, it will  
18 identify any gaps in the current literature and establish strengths and weaknesses of the research.  
19 This will identify potential areas for further research in human factors and EOC.

## 21 Methods and Analysis

### 22 Registration

23 This protocol adheres to the requirements of Preferred Reporting Items for Systematic Review and  
24 Meta-analysis Protocols (PRISMA-P). The protocol was registered with PROSPERO  
25 (CRD42018104745)

### 26 Information sources

27 Literature search strategies will be developed using Medical Subject Headings (MeSH) and text  
28 words related to the human factors involved in the escalation of care for deteriorating patients.

29 The following databases will be searched: MEDLINE (Ovid), EMBASE (Ovid).

30 Reference lists of eligible studies and relevant reviews will be explored to identify further eligible  
31 studies.

### 32 Search strategy

33 A draft of the search strategy was developed by three of the authors (JE, VW and TP - a medical  
34 librarian). The proposed search strategy is shown in the online Supplementary File 1.

### 35 Inclusion Criteria

#### 36 *Types of studies*

37 This systematic review will include qualitative studies which report primary data. Qualitative studies  
38 are defined as those studies which use qualitative data collection and analysis methods. These can

1 include but are not limited to: ethnography, interviews, focus groups and human factors methods.  
2 Data analysis is likely to be but not limited to: thematic analysis, grounded theory and discourse  
3 analysis.

#### 4 *Phenomenon of interest*

5 Studies must report primary data and describe the human factors which affect FTR and EOC. FTR is  
6 defined as patient mortality following complications (1) and EOC is a staged process where patients  
7 are detected as deteriorating and that deterioration is communicated followed by a senior review  
8 (3). We will include any qualitative study which explores the perspective of patients or clinical staff  
9 (adults or paediatric) and the human factors which affect the EOC process. We are defining human  
10 factors as any barrier or facilitator that affects teamwork, tasks, equipment, workspace, culture and  
11 organisation (15).

#### 12 *Setting*

13 The study setting is in-hospital, ward care.

#### 14 **Exclusion criteria**

##### 15 *Types of studies*

16 We will exclude systematic reviews, grey-literature, editorials, letters, practice guidelines and  
17 abstract-only reports. We will also exclude protocols without study data.

##### 19 *Phenomenon of interest*

20 We are only interested in real-life scenarios where human factors effects can be studied in the  
21 patient environment. Simulation based studies will be excluded.

##### 22 *Setting*

23 We will exclude studies carried out in the Emergency Department, Critical Care (including the  
24 Intensive Care Unit and Coronary care) or Maternity. These are specialised areas which makes  
25 generalisability of EOC themes to the ward environment challenging. We will also exclude studies  
26 set in palliative care.

##### 27 *Time-frame*

28 No time limitations will be applied

##### 29 *Language*

30 Non-English papers will be excluded.

#### 31 **Study selection**

32 Reference lists from both databases will be entered into Covidence software (Covidence systematic  
33 review software, Veritas Health Innovation, Melbourne, Australia. Available at [www.covidence.org](http://www.covidence.org)).  
34 Papers will be de-duplicated. Two authors will independently screen titles and abstracts of identified  
35 papers against the inclusion and exclusion criteria. They will not be blinded to journal titles, study  
36 authors or institutions. If there is disagreement or uncertainty regarding eligibility, the full-text will  
37 be reviewed. We will retrieve full-text for all articles not excluded by the initial screening. Two  
38 authors will independently assess these papers against the inclusion and exclusion criteria outlined  
39 above. We will resolve disagreements about eligibility by discussion between the screening  
40 researchers or a third party. We will record the reason for excluding studies.

#### 41 **Data extraction**

1 Data extraction tools will be developed and piloted before the review takes place. Extracted data will  
 2 be entered into an Excel spreadsheet. Initial codes from studies will be documented with NVivo  
 3 [NVivo qualitative data analysis Software; QSR International Pty Ltd. Version 10, 2014]. Two  
 4 reviewers will independently extract a selection data from the texts to ensure validity of results. Any  
 5 discrepancies within the data collection phase will be resolved by discussion between reviewers.

#### 6 *Data items extracted*

7 We will extract the following data from each included publication. The data extraction method has  
 8 been piloted with a sample selection of papers and valid data has been obtained.

9 *Table 1- Anticipated data to be extracted*

| Study Characteristics                                                                                                                                                                                                                       | Patient/Participant demographics                                                                                        | Study setting                                                                                                   | Themes                                                    | Rigor                                                                                                                    |
|---------------------------------------------------------------------------------------------------------------------------------------------------------------------------------------------------------------------------------------------|-------------------------------------------------------------------------------------------------------------------------|-----------------------------------------------------------------------------------------------------------------|-----------------------------------------------------------|--------------------------------------------------------------------------------------------------------------------------|
| <ul style="list-style-type: none"> <li>• Author</li> <li>• Date of study</li> <li>• Study Type</li> <li>• Methodology</li> <li>• Country of study</li> <li>• Data collection methods</li> <li>• Journal</li> <li>• Data analyses</li> </ul> | <ul style="list-style-type: none"> <li>• Age</li> <li>• Patient group</li> <li>• In-patient characterisation</li> </ul> | <ul style="list-style-type: none"> <li>• Level of care</li> <li>• Hospital Type</li> <li>• Education</li> </ul> | <ul style="list-style-type: none"> <li>• Codes</li> </ul> | <ul style="list-style-type: none"> <li>• Strengths</li> <li>• Weaknesses</li> <li>• Reporting guidelines used</li> </ul> |

10

#### 11 **Quality Assessment**

12 The CASP qualitative checklist (Critical Appraisal Skills Programme) will be used to assess credibility,  
 13 transferability, dependability and confirmability. This checklist is an extensive and comprehensive  
 14 tool commonly used in qualitative study assessment (16,17). Two researchers will discuss quality  
 15 findings for each study and a consensus will be reached as to the studies' inclusion or exclusion  
 16 within the systematic review. As part of the CASP assessment the authors will explore the potential  
 17 for reporting bias within the studies and biases will be reported in studies' limitations.

#### 18 **Data Analysis**

19 We will undertake a thematic synthesis (17) using the Thomas and Harden (18) framework. The  
 20 three stages of the framework are: coding of the findings of studies, categorisation of codes into  
 21 descriptive themes, and categorisation of descriptive themes into analytical themes (19). NVivo  
 22 software will be used to facilitate the analysis and record decisions (audit trail) of coding by the  
 23 researchers. Codes relating to human factors and EOC will be identified in the text, and tables will be  
 24 used to create descriptive and analytical themes. Key codes, descriptive themes and analytical  
 25 themes will be presented in the results.

#### 26 **Ethics and dissemination**

27 The proposed systematic review will use available published literature and therefore no ethical  
 28 approval is required. This systematic review will be limited by the quality of studies available and the  
 29 rigor and reproducibility of study findings. Original studies included in the review could themselves  
 30 be limited and it may be difficult to assess the researcher involvement and their individual bias. The

1 two researchers carrying out screening for this review come from different professional  
2 backgrounds; this limits interpretation bias when assessing the studies to include. A recognised  
3 assessment tool will be used to determine study quality. Using NVivo to code studies will aid  
4 transparency in and demonstrate a clear strategy for identifying themes. An audit trail will be kept  
5 throughout the systematic review detailing research decisions made and methodological steps  
6 taken.

7 The results from this review will be published and made publically available. A number of social  
8 media techniques (Twitter, Facebook) will be used to promote the protocol, final systematic review  
9 paper and results. We will also aim to attend at least one conference to present findings from this  
10 work.

11  
12

For peer review only



## References

1. Ghaferi AA, Osborne NH, Birkmeyer JD, Dimick JB. Hospital characteristics associated with failure to rescue from complications after pancreatectomy. *J Am Coll Surg* [Internet]. 2010;211(3):325–30. Available from: <http://dx.doi.org/10.1016/j.jamcollsurg.2010.04.025>
2. Gonzalez AA, Dimick JB, Birkmeyer JD, Ghaferi AA. Understanding the volume-outcome effect in cardiovascular surgery: The role of failure to rescue. *JAMA Surg*. 2014;149(2):119–23.
3. Findlay G, Shotton H, Mason K. Time to Intervene? Natl Confid Enq into Patient Outcome Death [Internet]. 2012;1–125. Available from: [http://www.ncepod.org.uk/2012report1/downloads/CAP\\_fullreport.pdf](http://www.ncepod.org.uk/2012report1/downloads/CAP_fullreport.pdf)
4. NICE. Acutely ill adults in hospital: recognising Acutely ill adults in hospital: recognising and responding to deterior and responding to deterioration (CG50). 2007;(July). Available from: [www.nice.org.uk/guidance/cg50](http://www.nice.org.uk/guidance/cg50)
5. NHS Improvement. The adult patient who is deteriorating: sharing learning from literature, incident reports and root cause analysis investigations. 2016;(July):23. Available from: [https://improvement.nhs.uk/documents/176/Deterioration\\_in\\_adults\\_report\\_7july.pdf](https://improvement.nhs.uk/documents/176/Deterioration_in_adults_report_7july.pdf)
6. Fox P. An acute problem. *Nurs Elder*. 2005;3(4):33.
7. Harper SJ. NCEPOD: Caring to the end? *J Intensive Care Soc*. 2010;11(2):88–9.
8. National Confidential Enquiry into Patient Outcome and Death. Emergency Admissions: A journey in the right direction? 2007; Available from: <http://www.ncepod.org.uk/2007ea.htm>
9. Johnston M, Arora S, King D, Stroman L, Darzi A. Escalation of care and failure to rescue: A multicenter, multiprofessional qualitative study. *Surgery* [Internet]. 2014 Jun [cited 2017 Aug 7];155(6):989–94. Available from: <http://linkinghub.elsevier.com/retrieve/pii/S0039606014000476>
10. Chua WL, Mackey S, Ng EKC, Liaw SY. Front line nurses' experiences with deteriorating ward patients: A qualitative study. *Int Nurs Rev*. 2013;60(4):501–9.
11. Mochizuki K, Shintani R, Mori K, Sato T, Sakaguchi O, Takeshige K, et al. Importance of respiratory rate for the prediction of clinical deterioration after emergency department discharge: a single-center, case-control study. *Acute Med Surg* [Internet]. 2016;1–7. Available from: <http://doi.wiley.com/10.1002/ams2.252>
12. Brady PW, Goldenhar LM. A qualitative study examining the influences on situation awareness and the identification, mitigation and escalation of recognised patient risk. *BMJ Qual Saf* [Internet]. 2014 [cited 2017 May 9];23:153–61. Available from: <http://dx.doi.org/10.1136/bmjqs-2012-001747>
13. Shearer B, Marshall S, Buist MD, Finnigan M, Kitto S, Hore T, et al. What stops hospital clinical staff from following protocols? An analysis of the incidence and factors behind the failure of bedside clinical staff to activate the rapid response system in a multi-campus Australian metropolitan healthcare service. *BMJ Qual Saf* [Internet]. 2012;21(7):569–75. Available from: <http://qualitysafety.bmj.com/lookup/doi/10.1136/bmjqs-2011-000692>
14. Donohue LA, Endacott R. Track, trigger and teamwork: Communication of deterioration in acute medical and surgical wards Background. *Intensive Crit Care Nurs* [Internet]. 2010 [cited 2017 May 9];26. Available from: <http://ac.els-cdn.com/S0964339709001074/1-s2.0->

- 1  
2  
3 1 S0964339709001074-main.pdf?\_tid=42ebcfc6-34aa-11e7-a31b-  
4 2 00000aacb362&acdnat=1494329333\_5d17d9cc08ce503e7b37debb709eaa99  
5  
6 3 15. Human Factors in Healthcare Patient Stories. 2013;  
7  
8 4 16. Greenhalgh T. HOW TO READ The basics of evidence based medicine [Internet]. Vol. 315,  
9 5 British Medical Journal. 2001. 596-9 p. Available from:  
10 6 [http://www.pubmedcentral.nih.gov/articlerender.fcgi?artid=2127419&tool=pmcentrez&ren](http://www.pubmedcentral.nih.gov/articlerender.fcgi?artid=2127419&tool=pmcentrez&rendertype=abstract)  
11 7 [dertype=abstract](http://www.pubmedcentral.nih.gov/articlerender.fcgi?artid=2127419&tool=pmcentrez&rendertype=abstract)  
12  
13 8 17. Tacconelli E. Systematic reviews: CRD's guidance for undertaking reviews in health care  
14 9 [Internet]. Vol. 10, The Lancet Infectious Diseases. 2010. 226 p. Available from:  
15 10 <http://linkinghub.elsevier.com/retrieve/pii/S1473309910700657>  
16  
17 11 18. Gedda M. Traduction française des lignes directrices ENTREQ pour l'écriture et la lecture des  
18 12 synthèses de recherche qualitative. *Kinesitherapie*. 2015;15(157):55–8.  
19  
20 13 19. Barnett-Page E, Thomas J. Methods for the synthesis of qualitative research: A critical review.  
21 14 *BMC Med Res Methodol*. 2008;9(1).  
22  
23  
24  
25  
26  
27  
28  
29  
30  
31  
32  
33  
34  
35  
36  
37  
38  
39  
40  
41  
42  
43  
44  
45  
46  
47  
48  
49  
50  
51  
52  
53  
54  
55  
56  
57  
58  
59  
60

## 1 Contributions

2 PW is the guarantor. JE was responsible for the overall design of the systematic review. JE and VW  
3 drafted the manuscript. TP and JE developed the search strategy. PW and JD provided systematic  
4 review and qualitative expertise. All authors read, provided feedback and approved the final  
5 manuscript.

## 6 Declarations

### 7 *Funding*

8 This systematic review protocol is funded by NIHR Biomedical Research Centre, based at Oxford  
9 University Hospitals Trust, Oxford and the Department of Health and Wellcome Trust through the  
10 Health Innovation Challenge Fund.

11 This publication presents independent research commissioned by the Health Innovation Challenge  
12 Fund (HICF-R9-524; WT-103703/Z/14/Z), a parallel funding partnership between the Department of  
13 Health and Wellcome Trust. The views expressed in this publication are those of the author(s) and  
14 not necessarily those of the Department of Health or Wellcome Trust. This work was also supported  
15 by the NIHR Biomedical Research Centre, Oxford.

### 16 *Availability of data and materials*

17 Not applicable

### 18 *Consent for publication*

19 Not applicable

### 20 *Ethics approval and consent to participate*

21 Not applicable

### 22 *Competing interests*

23 The authors declare that they have no competing interests.

24

**Supplementary File 1** (Draft Search Strategy for MEDLINE)

1. HOSPITALIZATION/
2. TERTIARY CARE CENTERS/
3. (ward or wards).ab,ti.
4. (inhospital or inpatient\* or "in hospital").ab,ti.
5. (hospitalised or hospitalized).ab,ti.
6. "general hospital".ab,ti.
7. "nurs\* staff\* ".ab,ti.
8. "in patient".ab,ti.
9. bedside.ab,ti.
10. outreach.ab,ti.
11. 1 or 2 or 3 or 4 or 5 or 6 or 7 or 8 or 9 or 10
12. FAILURE TO RESCUE,HEALTH CARE/
13. "fail\* to rescue ".ab,ti.
14. VITAL SIGNS/
15. MONITORING,PHYSIOLOGIC/
16. "vital sign\* ".ab,ti.
17. (track and trigger).ab,ti.
- 18."early warning".ab,ti.
19. "warning score\* ".ab,ti.
20. "early sign\* ".ab,ti.
21. "warning system\* ".ab,ti.
22. (deteriorat\* or escalat\*).ab,ti.
23. triggering.ab,ti.
24. HOSPITAL RAPID RESPONSE TEAM/
25. "rapid response".ab,ti.
26. "critical care outreach".ab,ti.
27. 12 or 13 or 14 or 15 or 16 or 17 or 18 or 19 or 20 or 21 or 22 or 23 or 24 or 25 or 26
28. MEDICAL ERROR/
29. DELAYED DIAGNOSIS/
30. COMMUNICATION/
31. PATIENT CARE TEAMS/

1  
2  
3 32. PATIENT SAFETY/  
4

5 33. ORGANIZATIONAL CULTURE/  
6

7 34. LEADERSHIP/  
8

9 35. "human factor\* ".af.  
10

11 36. "human error\* ".af.  
12

13 37. "clinical error\* ".af.  
14

15 38. "medical error\* ".af.  
16

17 39. "protocol adherence".af.  
18

19 40. "protocol compliance".af.  
20

21 41. "teamwork\* ".af.  
22

23 42. communication.af.  
24

25 43. ("socio cultural" or sociocultural).af.  
26

27 44. "situation awareness".af.  
28

29 45. "organisational culture".af.  
30

31 46. "organizational culture".af.  
32

33 47. "safety culture".af.  
34

35 48. "patient safety".af.  
36

37 49. leadership.af.  
38

39 50. "root cause analysis".af.  
40

41 51. 28 or 29 or 30 or 31 or 32 or 33 or 34 or 35 or 36 or 37 or 38 or 39 or 40 or 41 or 42 or 43 or 44  
42 or 45 or 46 or 47 or 48 or 49 or 50  
43

44 52. 11 and 27 and 51  
45  
46  
47  
48  
49  
50  
51  
52  
53  
54  
55  
56  
57  
58  
59  
60

**PRISMA-P (Preferred Reporting Items for Systematic review and Meta-Analysis Protocols) 2015 checklist: recommended items to address in a systematic review protocol\***

| Section and topic                 | Item No | Checklist item                                                                                                                                                                                                                | Page No                             |
|-----------------------------------|---------|-------------------------------------------------------------------------------------------------------------------------------------------------------------------------------------------------------------------------------|-------------------------------------|
| <b>ADMINISTRATIVE INFORMATION</b> |         |                                                                                                                                                                                                                               |                                     |
| Title:                            |         |                                                                                                                                                                                                                               |                                     |
| Identification                    | 1a      | Identify the report as a protocol of a systematic review                                                                                                                                                                      | Pg 1 Line 3                         |
| Update                            | 1b      | If the protocol is for an update of a previous systematic review, identify as such                                                                                                                                            | n/a                                 |
| Registration                      | 2       | If registered, provide the name of the registry (such as PROSPERO) and registration number                                                                                                                                    | Pg 2 Line 28<br>Pg 3 Lines 22-25    |
| Authors:                          |         |                                                                                                                                                                                                                               |                                     |
| Contact                           | 3a      | Provide name, institutional affiliation, e-mail address of all protocol authors; provide physical mailing address of corresponding author                                                                                     | Pg 1 Lines 6-10                     |
| Contributions                     | 3b      | Describe contributions of protocol authors and identify the guarantor of the review                                                                                                                                           | Pg 9 Lines 1-5                      |
| Amendments                        | 4       | If the protocol represents an amendment of a previously completed or published protocol, identify as such and list changes; otherwise, state plan for documenting important protocol amendments                               | n/a                                 |
| Support:                          |         |                                                                                                                                                                                                                               |                                     |
| Sources                           | 5a      | Indicate sources of financial or other support for the review                                                                                                                                                                 | Pg 1 Lines 13-16<br>Pg 9 Lines 6-10 |
| Sponsor                           | 5b      | Provide name for the review funder and/or sponsor                                                                                                                                                                             | Pg 1 Lines 13-16<br>Pg 9 Lines 6-10 |
| Role of sponsor or funder         | 5c      | Describe roles of funder(s), sponsor(s), and/or institution(s), if any, in developing the protocol                                                                                                                            | n/a                                 |
| <b>INTRODUCTION</b>               |         |                                                                                                                                                                                                                               |                                     |
| Rationale                         | 6       | Describe the rationale for the review in the context of what is already known                                                                                                                                                 | Pg 2 Lines 2-12<br>Pg 3 Lines 9-14  |
| Objectives                        | 7       | Provide an explicit statement of the question(s) the review will address with reference to participants, interventions, comparators, and outcomes (PICO)                                                                      | Pg 3 Lines 15-19                    |
| <b>METHODS</b>                    |         |                                                                                                                                                                                                                               |                                     |
| Eligibility criteria              | 8       | Specify the study characteristics (such as PICO, study design, setting, time frame) and report characteristics (such as years considered, language, publication status) to be used as criteria for eligibility for the review | Pg 3 Lines 35-38<br>Pg 4 Lines 1-13 |

|                                    |     |                                                                                                                                                                                                                                                  |                                                     |
|------------------------------------|-----|--------------------------------------------------------------------------------------------------------------------------------------------------------------------------------------------------------------------------------------------------|-----------------------------------------------------|
| Information sources                | 9   | Describe all intended information sources (such as electronic databases, contact with study authors, trial registers or other grey literature sources) with planned dates of coverage                                                            | Pg 3 Lines 26-31                                    |
| Search strategy                    | 10  | Present draft of search strategy to be used for at least one electronic database, including planned limits, such that it could be repeated                                                                                                       | Supplementary File 1                                |
| Study records:                     |     |                                                                                                                                                                                                                                                  |                                                     |
| Data management                    | 11a | Describe the mechanism(s) that will be used to manage records and data throughout the review                                                                                                                                                     | Pg 4 Lines 30-32<br>Pg 4 Lines 41-42<br>Pg 5 Line 1 |
| Selection process                  | 11b | State the process that will be used for selecting studies (such as two independent reviewers) through each phase of the review (that is, screening, eligibility and inclusion in meta-analysis)                                                  | Pg 4 Lines 30-39                                    |
| Data collection process            | 11c | Describe planned method of extracting data from reports (such as piloting forms, done independently, in duplicate), any processes for obtaining and confirming data from investigators                                                           | Pg 4 Lines 40-42<br>Pg 5 Lines 1-2                  |
| Data items                         | 12  | List and define all variables for which data will be sought (such as PICO items, funding sources), any pre-planned data assumptions and simplifications                                                                                          | Pg 5 Lines 4-8 (inc table)                          |
| Outcomes and prioritization        | 13  | List and define all outcomes for which data will be sought, including prioritization of main and additional outcomes, with rationale                                                                                                             | Pg 3 Lines 15-19                                    |
| Risk of bias in individual studies | 14  | Describe anticipated methods for assessing risk of bias of individual studies, including whether this will be done at the outcome or study level, or both; state how this information will be used in data synthesis                             | Pg 5 Lines 9-15                                     |
| Data synthesis                     | 15a | Describe criteria under which study data will be quantitatively synthesised                                                                                                                                                                      | n/a                                                 |
|                                    | 15b | If data are appropriate for quantitative synthesis, describe planned summary measures, methods of handling data and methods of combining data from studies, including any planned exploration of consistency (such as $I^2$ , Kendall's $\tau$ ) | n/a                                                 |
|                                    | 15c | Describe any proposed additional analyses (such as sensitivity or subgroup analyses, meta-regression)                                                                                                                                            | n/a                                                 |
|                                    | 15d | If quantitative synthesis is not appropriate, describe the type of summary planned                                                                                                                                                               | n/a                                                 |
| Meta-bias(es)                      | 16  | Specify any planned assessment of meta-bias(es) (such as publication bias across studies, selective reporting within studies)                                                                                                                    | Pg 5 Lines 14-15                                    |
| Confidence in cumulative evidence  | 17  | Describe how the strength of the body of evidence will be assessed (such as GRADE)                                                                                                                                                               | Pg 5 Lines 9-15                                     |

**\* It is strongly recommended that this checklist be read in conjunction with the PRISMA-P Explanation and Elaboration (cite when available) for important clarification on the items. Amendments to a review protocol should be tracked and dated. The copyright for PRISMA-P (including checklist) is held by the PRISMA-P Group and is distributed under a Creative Commons Attribution Licence 4.0.**

*From: Shamseer L, Moher D, Clarke M, Ghersi D, Liberati A, Petticrew M, Shekelle P, Stewart L, PRISMA-P Group. Preferred reporting items for systematic review and meta-analysis protocols (PRISMA-P) 2015: elaboration and explanation. BMJ. 2015 Jan 2;349(jan02 1):g7647.*

# BMJ Open

## How human factors affect escalation of care: a protocol for a qualitative evidence synthesis of studies

|                                 |                                                                                                                                                                                                                                                                                                                                                                                                        |
|---------------------------------|--------------------------------------------------------------------------------------------------------------------------------------------------------------------------------------------------------------------------------------------------------------------------------------------------------------------------------------------------------------------------------------------------------|
| Journal:                        | <i>BMJ Open</i>                                                                                                                                                                                                                                                                                                                                                                                        |
| Manuscript ID                   | bmjopen-2018-025969.R1                                                                                                                                                                                                                                                                                                                                                                                 |
| Article Type:                   | Protocol                                                                                                                                                                                                                                                                                                                                                                                               |
| Date Submitted by the Author:   | 09-Jan-2019                                                                                                                                                                                                                                                                                                                                                                                            |
| Complete List of Authors:       | Ede, Jody; John Radcliffe Hospital, University of Oxford Westgate, Verity ; University of Oxford, Nuffield Department of Clinical Neurosciences<br>Petricin, Tatjana; University of Oxford Health Care Libraries, Cairns Library<br>Darbyshire, Julie; University of Oxford, NDCN<br>Watkinson, Peter; Oxford University Hospitals NHS Trust, Kadoorie Centre for Critical Care research and Education |
| <b>Primary Subject Heading</b>: | Qualitative research                                                                                                                                                                                                                                                                                                                                                                                   |
| Secondary Subject Heading:      | Evidence based practice, Nursing, Intensive care, Research methods                                                                                                                                                                                                                                                                                                                                     |
| Keywords:                       | Failure to rescue, Escalation of care, Human factors, Qualitative, Thematic synthesis, QUALITATIVE RESEARCH                                                                                                                                                                                                                                                                                            |
|                                 |                                                                                                                                                                                                                                                                                                                                                                                                        |

SCHOLARONE™  
Manuscripts



1  
2  
3  
4 1 Title Page5  
6  
7 2 **How human factors affect escalation of care: a**  
8  
9 3 **protocol for a qualitative evidence synthesis of**  
10  
11 4 **studies**  
12  
13 514 6 Corresponding Author Jody Ede University of Oxford [Jody.ede@ndcn.ox.ac.uk](mailto:Jody.ede@ndcn.ox.ac.uk)15  
16 7 Verity Westgate University of Oxford [verity.westgate@ndcn.ox.ac.uk](mailto:verity.westgate@ndcn.ox.ac.uk)17  
18 8 Tatjana Petrinic Oxford University Hospital NHS Trust [tatjana.petrinic@bodleian.ox.ac.uk](mailto:tatjana.petrinic@bodleian.ox.ac.uk)19  
20 9 Julie Darbyshire University of Oxford [Julie.darbyshire@ndcn.ox.ac.uk](mailto:Julie.darbyshire@ndcn.ox.ac.uk)21  
22 10 Peter Watkinson Associate Professor University of Oxford [peter.watkinson@ndcn.ox.ac.uk](mailto:peter.watkinson@ndcn.ox.ac.uk)23  
24  
25 12  
26 13 **“Supported by the NIHR Biomedical Research Centre, based at Oxford University Hospitals Trust,**  
27 14 **Oxford and the Wellcome Trust through the Health Innovation Challenge Fund. The views**  
28 15 **expressed are those of the author(s) and not necessarily those of the NHS, the NIHR or the**  
29 16 **Department of Health”**  
3031  
32 17  
33 18 Word count: 126434  
35 19 Keywords: Failure to rescue, escalation of care, human factors, qualitative, thematic, systematic  
36  
37  
38  
39  
40  
41  
42  
43  
44  
45  
46  
47  
48  
49  
50  
51  
52  
53  
54  
55  
56  
57  
58  
59  
60

## 1 ABSTRACT (300)

### 2 Introduction

3 Failure to rescue is defined as mortality after complications during hospital care. Incidence ranges  
4 10.9% - 13.3% and several national reports such as National Confidential Enquiry into Patient  
5 Outcomes and Death and National Institute of Clinical Excellence CG 50 highlight failure to rescue as  
6 a significant problem for safe patient care.

7 To avoid failure to rescue events, there must be successful escalation of care. Studies indicate that  
8 human factors such as situational awareness, team working, communication, and a culture  
9 promoting safety contribute to avoidance of failure to rescue events. Understanding human factors  
10 is essential to developing working-systems that mitigate barriers and facilitate prompt escalation of  
11 care. This qualitative evidence synthesis will identify and synthesise what is known about the human  
12 factors that affect escalation of care.

### 13 Methods and Analysis

14 We will search MEDLINE (Ovid), EMBASE (Ovid), and CINAHL for studies describing human factors  
15 affecting both failure to rescue and/or care escalation. A search strategy was developed by two  
16 researchers and a medical librarian. Only studies exploring in-hospital (ward) populations using  
17 qualitative data collection methods will be included. Screening will be conducted by two researchers  
18 from different professional backgrounds. We are likely to undertake a thematic synthesis, using the  
19 Thomas and Harden framework. Selected studies will be assessed for quality, rigor and limitations.  
20 Two researchers will extract and thematically synthesise codes using a piloted data extraction tool to  
21 develop analytical themes.

### 22 Ethics and dissemination

23 The qualitative evidence synthesis will use available published literature and no ethical approval is  
24 required. This synthesis will be limited by the quality of studies, rigor and reproducibility of study  
25 findings. This publication will synthesise what is known about human factors and escalation of care,  
26 highlighting gaps within the literature. Results will be published in a peer-reviewed journal,  
27 publicised at conferences and on social media.

### 28 TRIAL REGISTRATION

29 PROSPERO: (CRD42018104745)

### 30 ARTICLE SUMMARY

31 Strengths and limitations of this study

- 32 • Failure to rescue is a common problem in healthcare with significant effects on patient  
33 mortality
- 34 • For failure to rescue to be avoided, an escalation of care needs to occur. The efficacy of  
35 this can be positively or negatively affected by human factors
- 36 • This protocol ensures a comprehensive and unbiased search and analysis of qualitative  
37 studies exploring this phenomenon using best practice guidelines
- 38 • The results of this review will identify strengths and weaknesses of the literature in this  
39 area
- 40 • This review will highlight potential research direction for future studies and will address  
41 some of the weaknesses identified in published research projects

## 1 INTRODUCTION

2 Failure to rescue is defined as the mortality rate of patients who suffer complications in hospital (1).  
3 The incidence of failure to rescue events varies between hospitals but has been estimated as 10.9%  
4 in high-volume hospitals and 13.3% in low-volume hospitals (2). A proportion of patient deaths  
5 (32%) reported to the National Patient Safety Agency (NSPA) had failures surrounding diagnostic  
6 errors and deteriorations which were not adequately recognised (3). Failure to recognise the need to  
7 rescue patients by providing timely escalation of care is a finding in several national reports such as  
8 National Confidential Enquiry into Patient Outcomes and Death (NCEPOD) (4–7) and NICE CG 50 (8).

9 For ‘failure to rescue’ to be avoided, bedside clinical staff must usually initiate successful escalation  
10 of care (9). This staged process requires detection of deterioration, communication about  
11 deterioration, and medical actions following senior review (4). Many factors affect this process such  
12 as situational awareness, team working, communication, safety culture and leadership (4,10–14).  
13 Understanding these human factors is essential to developing working systems that mitigate barriers  
14 and facilitate prompt escalation of care.

15 The aim of this qualitative evidence synthesis is to map the human factors which affect escalation of  
16 care in the acute hospital setting. It will summarise what is currently understood about the role  
17 human factors play in the delivery of good clinical care. Secondly, it will identify gaps in the current  
18 literature and establish strengths and weaknesses of research conducted to date. This will produce  
19 an evidence base from which escalation of care theory could be developed. We will also identify  
20 potential areas for further research in human factors and the escalation of care process.

## 22 Methods and Analysis

### 23 Registration

24 This protocol adheres to the requirements of Preferred reporting items for systematic review and  
25 meta-analysis protocols (PRISMA-P). The protocol was registered with PROSPERO (ref:  
26 CRD42018104745)

### 27 Information sources

28 Literature search strategies will be developed using Medical Subject Headings (MeSH) and text  
29 words related to the human factors involved in the escalation of care for deteriorating patients.

30 The following databases will be searched: MEDLINE (Ovid), EMBASE (Ovid), and CINAHL.

31 Reference lists of eligible studies and relevant reviews will be explored to identify further eligible  
32 studies.

### 33 Search strategy

34 A draft of the search strategy was developed by three of the authors (JE, VW and TP). The proposed  
35 search strategy is shown in the online Supplementary File 1.

### 36 Inclusion Criteria

### 1 *Types of studies*

2 This qualitative evidence synthesis will include qualitative studies which report primary data.  
3 Qualitative studies are defined as those using qualitative data collection and analysis methods.  
4 These can include, but are not limited to, ethnography, interviews, focus groups and human factors  
5 methods. Data analysis is likely (but not limited) to include thematic analysis, grounded theory,  
6 and/or discourse analysis. We will also include grey literature. All studies meeting inclusion criteria  
7 will be included and reviewed.

### 8 *Study focus*

9 Studies must report primary data and describe human factors affecting failure to rescue and  
10 escalation of care. Failure to rescue is defined as patient mortality following complications (1) and  
11 escalation of care is a staged process where patients are identified as 'deteriorating', and that  
12 deterioration is then communicated followed by senior review and medical intervention where  
13 necessary (4). We will include any qualitative study which explores the perspective of patients or  
14 clinical staff (adults or paediatric) and the human factors which affect the escalation of care process.  
15 We are defining human factors as any barrier or facilitator that affects teamwork, tasks, equipment,  
16 workspace, culture, or organisation (15).

### 17 *Setting*

18 The study setting is in-hospital, ward care.

### 19 **Exclusion criteria**

#### 20 *Types of studies*

21 We will exclude systematic reviews, editorials, letters, practice guidelines and abstract-only reports.  
22 We will also exclude protocols without study data.

#### 23 *Phenomenon of interest*

24 We are only interested in real-life scenarios where human factors effects can be studied in the  
25 patient environment. Simulation based studies will be excluded.

#### 26 *Setting*

27 We will exclude studies carried out in the Emergency Department, Critical Care (including the  
28 Intensive Care Unit and Coronary care) or Maternity. These are specialised areas which makes it  
29 challenging to generalise to the ward environment any 'escalation of care' practices identified in  
30 these areas. We will also exclude studies set in palliative care.

#### 31 *Time-frame*

32 No time limitations will be applied

#### 33 *Language*

34 Non-English papers will be excluded.

### 35 **Study selection**

36 Reference lists from all databases will be entered into Covidence software (Covidence systematic  
37 review software, Veritas Health Innovation, Melbourne, Australia. Available at [www.covidence.org](http://www.covidence.org)).  
38 Papers will be de-duplicated. Two authors will independently screen titles and abstracts of identified  
39 papers against the inclusion and exclusion criteria. They will not be blinded to journal titles, study  
40 authors or institutions. If there is disagreement or uncertainty regarding eligibility, the full-text will  
41 be reviewed. We will retrieve full-text for all articles not excluded by the initial screening. Two  
42 authors will independently assess these papers against the inclusion and exclusion criteria outlined  
43 above. We will resolve disagreements about eligibility by discussion between the screening  
44 researchers or a third party. We will record the reason for excluding studies.

## 1 Data extraction

2 Data extraction tools will be developed and piloted before the review takes place. Extracted data will  
 3 be entered into Excel (Microsoft Office 2016). Initial coding will be documented with NVivo [NVivo  
 4 qualitative data analysis Software; QSR International Pty Ltd. Version 10, 2014]. Two reviewers will  
 5 independently extract a selection data from the texts to ensure validity of results. Any discrepancies  
 6 within the data collection phase will be resolved by discussion between reviewers or a third party.

### 7 *Data items extracted*

8 We will extract the following data from each included publication (refer to Table. 1 for full data  
 9 details). The data extraction method has been piloted with a sample selection of papers and valid  
 10 data have been obtained.

11 *Table 1- Anticipated data to be extracted*

| Study Characteristics                                                                                                                                                                                                                       | Patient/Participant demographics                                                                                        | Study setting                                                                                                   | Themes                                                    | Rigor                                                                                                                    |
|---------------------------------------------------------------------------------------------------------------------------------------------------------------------------------------------------------------------------------------------|-------------------------------------------------------------------------------------------------------------------------|-----------------------------------------------------------------------------------------------------------------|-----------------------------------------------------------|--------------------------------------------------------------------------------------------------------------------------|
| <ul style="list-style-type: none"> <li>• Author</li> <li>• Date of study</li> <li>• Study Type</li> <li>• Methodology</li> <li>• Country of study</li> <li>• Data collection methods</li> <li>• Journal</li> <li>• Data analyses</li> </ul> | <ul style="list-style-type: none"> <li>• Age</li> <li>• Patient group</li> <li>• In-patient characterisation</li> </ul> | <ul style="list-style-type: none"> <li>• Level of care</li> <li>• Hospital Type</li> <li>• Education</li> </ul> | <ul style="list-style-type: none"> <li>• Codes</li> </ul> | <ul style="list-style-type: none"> <li>• Strengths</li> <li>• Weaknesses</li> <li>• Reporting guidelines used</li> </ul> |

## 13 Quality Assessment

14 The CASP qualitative checklist (Critical Appraisal Skills Programme) will be used to assess credibility,  
 15 transferability, dependability and confirmability. This checklist is an extensive and comprehensive  
 16 tool commonly used in qualitative study assessment (16,17). As part of the CASP assessment the  
 17 authors will explore the potential for reporting bias within the studies and biases will be reported in  
 18 studies' limitations. We will also apply the Confidence in the Evidence from Reviews of Qualitative  
 19 research (GRADE-CERQual) criteria to judge studies (18). Two researchers will discuss each study and  
 20 a consensus will be reached to include or exclude.

## 21 Data Analysis

22 This review aims to explore relevant theory and map barriers and facilitators to escalation of care for  
 23 which thematic synthesis is well suited (17). We are likely to undertake a thematic synthesis, using  
 24 the Thomas and Harden framework (19). This framework supports data extraction from anywhere  
 25 within the paper, and is not confined to the results alone. The three stages of the framework are:  
 26 coding findings from included studies, categorisation of codes into descriptive themes, and  
 27 categorisation of descriptive themes into analytical themes (19). Stage one involves line by line  
 28 coding of data, where each sentence is allocated a code. Stage two involves categorising each coded  
 29 sentence into descriptive, broader themes. The final stage involves generating analytical themes, or  
 30 'going beyond' the findings of the initial study, which relate to the fixed or emerging research  
 31 question. Whilst we have been explicit at this point as to the anticipated framework, it is also

1 justifiable for this to change once the search has been conducted (20). NVivo software will be used  
2 to code the original text from the papers. Using this software will facilitate analysis for this evidence  
3 synthesis and will be used to record decisions (by audit trail) of coding. Codes relating to human  
4 factors and escalation of care will be identified from anywhere within the papers, and tables will be  
5 used to record descriptive and analytical themes. Key codes, descriptive themes and analytical  
6 themes will be presented in the results. We will use the enhancing transparency in reporting the  
7 synthesis of qualitative research (ENTREQ) guidelines to report findings (21).

### 8 **Patient and Public Involvement (PPI)**

9 A patient representative has read and provided feedback on the protocol. As a result, some points  
10 have been clarified and medical “jargon” removed.

### 12 **Ethics and dissemination**

13 The proposed evidence synthesis will use published literature and therefore no ethical approval is  
14 required. This publication will be limited by the quality of studies available and the rigor and  
15 reproducibility of study findings. Original studies included in the review could themselves be limited  
16 and it may be difficult to assess the researcher involvement and their individual bias. The two  
17 researchers carrying out screening for this review come from different professional backgrounds,  
18 limiting interpretation bias when assessing the studies for inclusion. A recognised assessment tool  
19 will be used to determine study quality. Using NVivo to code studies will aid transparency and  
20 demonstrate a clear strategy for theme identification. An audit trail kept throughout the process,  
21 will detail decisions made and methodological steps taken.

22 The results from this review will be published and made freely available. A number of social media  
23 techniques (including Twitter, Facebook, and our research group website) will be used to promote  
24 the protocol, final paper and results. We will also aim to attend at least one conference to present  
25 findings from this work.

## 1 References

- 1 2  
3 1. Ghaferi AA, Osborne NH, Birkmeyer JD, Dimick JB. Hospital characteristics associated with  
4 failure to rescue from complications after pancreatectomy. *J Am Coll Surg* [Internet]. Elsevier  
5 Inc.; 2010;211(3):325–30. Available from:  
6 <http://dx.doi.org/10.1016/j.jamcollsurg.2010.04.025>
- 7 2. Ghaferi AA, Birkmeyer JD, Dimick JB. Hospital volume and failure to rescue with high-risk  
8 surgery. *Med Care*. 2011;49(12):1076–81.
- 9 3. NHS Improvement. The adult patient who is deteriorating: sharing learning from literature,  
10 incident reports and root cause analysis investigations. 2016;(July):23. Available from:  
11 [https://improvement.nhs.uk/documents/176/Deterioration\\_in\\_adults\\_report\\_7july.pdf](https://improvement.nhs.uk/documents/176/Deterioration_in_adults_report_7july.pdf)
- 12 4. Findlay G, Shotton H, Mason K. Time to Intervene? Natl Confid Enq into Patient Outcome  
13 Death [Internet]. 2012;1–125. Available from:  
14 [http://www.ncepod.org.uk/2012report1/downloads/CAP\\_fullreport.pdf](http://www.ncepod.org.uk/2012report1/downloads/CAP_fullreport.pdf)
- 15 5. Fox P. An acute problem. *Nurs Elder*. 2005;3(4):33.
- 16 6. Harper SJ. NCEPOD: Caring to the end? *J Intensive Care Soc*. 2010;11(2):88–9.
- 17 7. National Confidential Enquiry into Patient Outcome and Death. Emergency Admissions: A  
18 journey in the right direction? 2007; Available from: <http://www.ncepod.org.uk/2007ea.htm>
- 19 8. NICE. Acutely ill adults in hospital: recognising Acutely ill adults in hospital: recognising and  
20 responding to deterior and responding to deterioration (CG50). 2007;(July). Available from:  
21 [www.nice.org.uk/guidance/cg50](http://www.nice.org.uk/guidance/cg50)
- 22 9. Johnston M, Arora S, King D, Stroman L, Darzi A. Escalation of care and failure to rescue: A  
23 multicenter, multiprofessional qualitative study. *Surgery* [Internet]. 2014 Jun [cited 2017 Aug  
7];155(6):989–94. Available from:



- 1  
2  
3 1 <http://linkinghub.elsevier.com/retrieve/pii/S0039606014000476>  
4  
5  
6 2 10. Chua WL, Mackey S, Ng EKC, Liaw SY. Front line nurses' experiences with deteriorating ward  
7  
8 3 patients: A qualitative study. *Int Nurs Rev*. 2013;60(4):501–9.  
9  
10  
11 4 11. Mochizuki K, Shintani R, Mori K, Sato T, Sakaguchi O, Takeshige K, et al. Importance of  
12  
13 5 respiratory rate for the prediction of clinical deterioration after emergency department  
14  
15 6 discharge: a single-center, case-control study. *Acute Med Surg [Internet]*. 2016;1–7. Available  
16  
17 7 from: <http://doi.wiley.com/10.1002/ams2.252>  
18  
19  
20  
21 8 12. Brady PW, Goldenhar LM. A qualitative study examining the influences on situation  
22  
23 9 awareness and the identification, mitigation and escalation of recognised patient risk. *BMJ*  
24  
25 10 *Qual Saf [Internet]*. 2014 [cited 2017 May 9];23:153–61. Available from:  
26  
27 11 <http://dx.doi.org/10.1136/bmjqs-2012-001747>  
28  
29  
30 12 13. Shearer B, Marshall S, Buist MD, Finnigan M, Kitto S, Hore T, et al. What stops hospital clinical  
31  
32 13 staff from following protocols? An analysis of the incidence and factors behind the failure of  
33  
34 14 bedside clinical staff to activate the rapid response system in a multi-campus Australian  
35  
36 15 metropolitan healthcare service. *BMJ Qual Saf [Internet]*. 2012;21(7):569–75. Available from:  
37  
38 16 <http://qualitysafety.bmj.com/lookup/doi/10.1136/bmjqs-2011-000692>  
39  
40  
41  
42 17 14. Donohue LA, Endacott R. Track, trigger and teamwork: Communication of deterioration in  
43  
44 18 acute medical and surgical wards Background. *Intensive Crit Care Nurs [Internet]*. 2010 [cited  
45  
46 19 2017 May 9];26. Available from: [http://ac.els-cdn.com/S0964339709001074/1-s2.0-](http://ac.els-cdn.com/S0964339709001074/1-s2.0-S0964339709001074-main.pdf?_tid=42ebcfc6-34aa-11e7-a31b-00000aacb362&acdnat=1494329333_5d17d9cc08ce503e7b37debb709eaa99)  
47  
48 20 [S0964339709001074-main.pdf?\\_tid=42ebcfc6-34aa-11e7-a31b-](http://ac.els-cdn.com/S0964339709001074/1-s2.0-S0964339709001074-main.pdf?_tid=42ebcfc6-34aa-11e7-a31b-00000aacb362&acdnat=1494329333_5d17d9cc08ce503e7b37debb709eaa99)  
49  
50 21 [00000aacb362&acdnat=1494329333\\_5d17d9cc08ce503e7b37debb709eaa99](http://ac.els-cdn.com/S0964339709001074/1-s2.0-S0964339709001074-main.pdf?_tid=42ebcfc6-34aa-11e7-a31b-00000aacb362&acdnat=1494329333_5d17d9cc08ce503e7b37debb709eaa99)  
51  
52  
53  
54 22 15. *Human Factors in Healthcare Patient Stories*. 2013;  
55  
56  
57 23 16. Greenhalgh T. HOW TO READ The basics of evidence based medicine [Internet]. Vol. 315,  
58  
59 24 *British Medical Journal*. 2001. 596-9 p. Available from:  
60



- 1  
2  
3 1 [http://www.pubmedcentral.nih.gov/articlerender.fcgi?artid=2127419&tool=pmcentrez&ren](http://www.pubmedcentral.nih.gov/articlerender.fcgi?artid=2127419&tool=pmcentrez&rendertype=abstract)  
4  
5 2 [dertype=abstract](http://www.pubmedcentral.nih.gov/articlerender.fcgi?artid=2127419&tool=pmcentrez&rendertype=abstract)  
6  
7  
8 3 17. Tacconelli E. Systematic reviews: CRD's guidance for undertaking reviews in health care  
9  
10 4 [Internet]. Vol. 10, The Lancet Infectious Diseases. 2010. 226 p. Available from:  
11  
12 5 <http://linkinghub.elsevier.com/retrieve/pii/S1473309910700657>  
13  
14  
15 6 18. Lewin S, Booth A, Glenton C, Munthe-Kaas H, Rashidian A, Wainwright M, et al. Applying  
16  
17 GRADE-CERQual to qualitative evidence synthesis findings: introduction to the series.  
18 7  
19 Implement Sci [Internet]. 2018 [cited 2018 Dec 17];13(1). Available from:  
20 8  
21 9 <http://creativecommons.org/publicdomain/zero/1.0/>  
22  
23  
24 10 19. Barnett-Page E, Thomas J. Methods for the synthesis of qualitative research: A critical review.  
25  
26 11 BMC Med Res Methodol. 2008;9(1).  
27  
28  
29 12 20. Dixon-Woods M. Using framework-based synthesis for conducting reviews of qualitative  
30  
31 studies. BMC Med. 2011;9:9–10.  
32  
33  
34 14 21. Enhancing transparency in reporting the synthesis of qualitative research: ENTREQ | The  
35  
36 EQUATOR Network [Internet]. [cited 2018 Dec 14]. Available from: [http://www.equator-](http://www.equator-network.org/reporting-guidelines/entreq/)  
37  
38  
39  
40  
41  
42  
43  
44  
45  
46  
47  
48  
49  
50  
51  
52  
53  
54  
55  
56  
57  
58  
59  
60

1  
2  
3  
4  
5  
6  
7  
8  
9  
10  
11  
12  
13  
14  
15  
16  
17  
18  
19  
20  
21  
22  
23  
24  
25  
26  
27  
28  
29  
30  
31  
32  
33  
34  
35  
36  
37  
38  
39  
40  
41  
42  
43  
44  
45  
46  
47  
48  
49  
50  
51  
52  
53  
54  
55  
56  
57  
58  
59  
60

1  
2  
3  
4  
5  
6  
7  
8  
9

For peer review only

## 1 **Contributions**

2 PW is the guarantor. JE was responsible for the overall design of the QES. JE and VW drafted the  
3 manuscript. TP and JE developed the search strategy. PW and JD provided QES and qualitative  
4 expertise. All authors read, provided feedback and approved the final manuscript. We would like to  
5 thank patient representative, TD for his contribution to this work.

## 6 **Declarations**

### 7 *Funding*

8 This QES protocol is funded by NIHR Biomedical Research Centre, based at Oxford University  
9 Hospitals Trust, Oxford and the Department of Health and Wellcome Trust through the Health  
10 Innovation Challenge Fund.

11 This publication presents independent research commissioned by the Health Innovation Challenge  
12 Fund (HICF-R9-524; WT-103703/Z/14/Z), a parallel funding partnership between the Department of  
13 Health and Wellcome Trust. The views expressed in this publication are those of the author(s) and  
14 not necessarily those of the Department of Health or Wellcome Trust. This work was also supported  
15 by the NIHR Biomedical Research Centre, Oxford.

### 16 *Availability of data and materials*

17 Not applicable

### 18 *Consent for publication*

19 Not applicable

### 20 *Ethics approval and consent to participate*

21 Not applicable

### 22 *Competing interests*

23 The authors declare that they have no competing interests.

24

**Supplementary File 1** (Draft Search Strategy for MEDLINE)

1. HOSPITALIZATION/
2. TERTIARY CARE CENTERS/
3. (ward or wards).ab,ti.
4. (inhospital or inpatient\* or "in hospital").ab,ti.
5. (hospitalised or hospitalized).ab,ti.
6. "general hospital".ab,ti.
7. "nurs\* staff\* ".ab,ti.
8. "in patient".ab,ti.
9. bedside.ab,ti.
10. outreach.ab,ti.
11. 1 or 2 or 3 or 4 or 5 or 6 or 7 or 8 or 9 or 10
12. FAILURE TO RESCUE,HEALTH CARE/
13. "fail\* to rescue ".ab,ti.
14. VITAL SIGNS/
15. MONITORING,PHYSIOLOGIC/
16. "vital sign\* ".ab,ti.
17. (track and trigger).ab,ti.
18. "early warning".ab,ti.
19. "warning score\* ".ab,ti.
20. "early sign\* ".ab,ti.
21. "warning system\* ".ab,ti.
22. (deteriorat\* or escalat\*).ab,ti.
23. triggering.ab,ti.
24. HOSPITAL RAPID RESPONSE TEAM/
25. "rapid response".ab,ti.
26. "critical care outreach".ab,ti.
27. 12 or 13 or 14 or 15 or 16 or 17 or 18 or 19 or 20 or 21 or 22 or 23 or 24 or 25 or 26
28. MEDICAL ERROR/
29. DELAYED DIAGNOSIS/
30. COMMUNICATION/
31. PATIENT CARE TEAMS/

1  
2  
3 32. PATIENT SAFETY/  
4

5 33. ORGANIZATIONAL CULTURE/  
6

7 34. LEADERSHIP/  
8

9 35. "human factor\* ".af.  
10

11 36. "human error\* ".af.  
12

13 37. "clinical error\* ".af.  
14

15 38. "medical error\* ".af.  
16

17 39. "protocol adherence".af.  
18

19 40. "protocol compliance".af.  
20

21 41. "teamwork\* ".af.  
22

23 42. communication.af.  
24

25 43. ("socio cultural" or sociocultural).af.  
26

27 44. "situation awareness".af.  
28

29 45. "organisational culture".af.  
30

31 46. "organizational culture".af.  
32

33 47. "safety culture".af.  
34

35 48. "patient safety".af.  
36

37 49. leadership.af.  
38

39 50. "root cause analysis".af.  
40

41 51. 28 or 29 or 30 or 31 or 32 or 33 or 34 or 35 or 36 or 37 or 38 or 39 or 40 or 41 or 42 or 43 or 44  
42 or 45 or 46 or 47 or 48 or 49 or 50  
43

44 52. 11 and 27 and 51  
45  
46  
47  
48  
49  
50  
51  
52  
53  
54  
55  
56  
57  
58  
59  
60

**PRISMA-P (Preferred Reporting Items for Systematic review and Meta-Analysis Protocols) 2015 checklist: recommended items to address in a systematic review protocol\***

| Section and topic                 | Item No | Checklist item                                                                                                                                                                                                                | Page No                             |
|-----------------------------------|---------|-------------------------------------------------------------------------------------------------------------------------------------------------------------------------------------------------------------------------------|-------------------------------------|
| <b>ADMINISTRATIVE INFORMATION</b> |         |                                                                                                                                                                                                                               |                                     |
| Title:                            |         |                                                                                                                                                                                                                               |                                     |
| Identification                    | 1a      | Identify the report as a protocol of a systematic review                                                                                                                                                                      | Pg 1 Line 3                         |
| Update                            | 1b      | If the protocol is for an update of a previous systematic review, identify as such                                                                                                                                            | n/a                                 |
| Registration                      | 2       | If registered, provide the name of the registry (such as PROSPERO) and registration number                                                                                                                                    | Pg 2 Line 29<br>Pg 3 Lines 25-26    |
| Authors:                          |         |                                                                                                                                                                                                                               |                                     |
| Contact                           | 3a      | Provide name, institutional affiliation, e-mail address of all protocol authors; provide physical mailing address of corresponding author                                                                                     | Pg 1 Lines 6-10                     |
| Contributions                     | 3b      | Describe contributions of protocol authors and identify the guarantor of the review                                                                                                                                           | Pg 10 Lines 1-4                     |
| Amendments                        | 4       | If the protocol represents an amendment of a previously completed or published protocol, identify as such and list changes; otherwise, state plan for documenting important protocol amendments                               | n/a                                 |
| Support:                          |         |                                                                                                                                                                                                                               |                                     |
| Sources                           | 5a      | Indicate sources of financial or other support for the review                                                                                                                                                                 | Pg 1 Lines 13-16<br>Pg 9 Lines 6-14 |
| Sponsor                           | 5b      | Provide name for the review funder and/or sponsor                                                                                                                                                                             | Pg 1 Lines 13-16<br>Pg 9 Lines 6-10 |
| Role of sponsor or funder         | 5c      | Describe roles of funder(s), sponsor(s), and/or institution(s), if any, in developing the protocol                                                                                                                            | n/a                                 |
| <b>INTRODUCTION</b>               |         |                                                                                                                                                                                                                               |                                     |
| Rationale                         | 6       | Describe the rationale for the review in the context of what is already known                                                                                                                                                 | Pg 2 Lines 2-12<br>Pg 3 Lines 1-14  |
| Objectives                        | 7       | Provide an explicit statement of the question(s) the review will address with reference to participants, interventions, comparators, and outcomes (PICO)                                                                      | Pg 3 Lines 15-20                    |
| <b>METHODS</b>                    |         |                                                                                                                                                                                                                               |                                     |
| Eligibility criteria              | 8       | Specify the study characteristics (such as PICO, study design, setting, time frame) and report characteristics (such as years considered, language, publication status) to be used as criteria for eligibility for the review | Pg 3 Lines 34-36<br>Pg 4 Lines 1-18 |

|                                    |     |                                                                                                                                                                                                                                                  |                                    |
|------------------------------------|-----|--------------------------------------------------------------------------------------------------------------------------------------------------------------------------------------------------------------------------------------------------|------------------------------------|
| Information sources                | 9   | Describe all intended information sources (such as electronic databases, contact with study authors, trial registers or other grey literature sources) with planned dates of coverage                                                            | Pg 3 Lines 27-32                   |
| Search strategy                    | 10  | Present draft of search strategy to be used for at least one electronic database, including planned limits, such that it could be repeated                                                                                                       | Supplementary File 1               |
| Study records:                     |     |                                                                                                                                                                                                                                                  |                                    |
| Data management                    | 11a | Describe the mechanism(s) that will be used to manage records and data throughout the review                                                                                                                                                     | Pg 4 Lines 36-38<br>Pg 5 Lines 2-6 |
| Selection process                  | 11b | State the process that will be used for selecting studies (such as two independent reviewers) through each phase of the review (that is, screening, eligibility and inclusion in meta-analysis)                                                  | Pg 4 Lines 38-44                   |
| Data collection process            | 11c | Describe planned method of extracting data from reports (such as piloting forms, done independently, in duplicate), any processes for obtaining and confirming data from investigators                                                           | Pg 5 Lines 2-6                     |
| Data items                         | 12  | List and define all variables for which data will be sought (such as PICO items, funding sources), any pre-planned data assumptions and simplifications                                                                                          | Pg 4 Lines 7-10(in table)          |
| Outcomes and prioritization        | 13  | List and define all outcomes for which data will be sought, including prioritization of main and additional outcomes, with rationale                                                                                                             | Pg 4 Lines 9-10                    |
| Risk of bias in individual studies | 14  | Describe anticipated methods for assessing risk of bias of individual studies, including whether this will be done at the outcome or study level, or both; state how this information will be used in data synthesis                             | Pg 5 Lines 13-20                   |
| Data synthesis                     | 15a | Describe criteria under which study data will be quantitatively synthesised                                                                                                                                                                      | n/a                                |
|                                    | 15b | If data are appropriate for quantitative synthesis, describe planned summary measures, methods of handling data and methods of combining data from studies, including any planned exploration of consistency (such as $I^2$ , Kendall's $\tau$ ) | n/a                                |
|                                    | 15c | Describe any proposed additional analyses (such as sensitivity or subgroup analyses, meta-regression)                                                                                                                                            | n/a                                |
|                                    | 15d | If quantitative synthesis is not appropriate, describe the type of summary planned                                                                                                                                                               | n/a                                |
| Meta-bias(es)                      | 16  | Specify any planned assessment of meta-bias(es) (such as publication bias across studies, selective reporting within studies)                                                                                                                    | Pg 5 Lines 13-20                   |
| Confidence in cumulative evidence  | 17  | Describe how the strength of the body of evidence will be assessed (such as GRADE)                                                                                                                                                               | Pg 5 Lines 19-20                   |

**\* It is strongly recommended that this checklist be read in conjunction with the PRISMA-P Explanation and Elaboration (cite when available) for important clarification on the items. Amendments to a review protocol should be tracked and dated. The copyright for PRISMA-P (including checklist) is held by the PRISMA-P Group and is distributed under a Creative Commons Attribution Licence 4.0.**

*From: Shamseer L, Moher D, Clarke M, Ghersi D, Liberati A, Petticrew M, Shekelle P, Stewart L, PRISMA-P Group. Preferred reporting items for systematic review and meta-analysis protocols (PRISMA-P) 2015: elaboration and explanation. BMJ. 2015 Jan 2;349(jan02 1):g7647.*

# BMJ Open

## How human factors affect escalation of care: a protocol for a qualitative evidence synthesis of studies

|                                 |                                                                                                                                                                                                                                                                                                                                                                                                        |
|---------------------------------|--------------------------------------------------------------------------------------------------------------------------------------------------------------------------------------------------------------------------------------------------------------------------------------------------------------------------------------------------------------------------------------------------------|
| Journal:                        | <i>BMJ Open</i>                                                                                                                                                                                                                                                                                                                                                                                        |
| Manuscript ID                   | bmjopen-2018-025969.R2                                                                                                                                                                                                                                                                                                                                                                                 |
| Article Type:                   | Protocol                                                                                                                                                                                                                                                                                                                                                                                               |
| Date Submitted by the Author:   | 05-Feb-2019                                                                                                                                                                                                                                                                                                                                                                                            |
| Complete List of Authors:       | Ede, Jody; John Radcliffe Hospital, University of Oxford Westgate, Verity ; University of Oxford, Nuffield Department of Clinical Neurosciences<br>Petricin, Tatjana; University of Oxford Health Care Libraries, Cairns Library<br>Darbyshire, Julie; University of Oxford, NDCN<br>Watkinson, Peter; Oxford University Hospitals NHS Trust, Kadoorie Centre for Critical Care research and Education |
| <b>Primary Subject Heading</b>: | Qualitative research                                                                                                                                                                                                                                                                                                                                                                                   |
| Secondary Subject Heading:      | Evidence based practice, Nursing, Intensive care, Research methods                                                                                                                                                                                                                                                                                                                                     |
| Keywords:                       | Failure to rescue, Escalation of care, Human factors, Qualitative, Thematic synthesis, QUALITATIVE RESEARCH                                                                                                                                                                                                                                                                                            |
|                                 |                                                                                                                                                                                                                                                                                                                                                                                                        |

SCHOLARONE™  
Manuscripts



1  
2  
3  
4 1 Title Page5  
6  
7 2 **How human factors affect escalation of care: a**  
8  
9 3 **protocol for a qualitative evidence synthesis of**  
10  
11 4 **studies**  
12  
13 514 6 Corresponding Author Jody Ede University of Oxford [Jody.ede@ndcn.ox.ac.uk](mailto:Jody.ede@ndcn.ox.ac.uk)15  
16 7 Verity Westgate University of Oxford [verity.westgate@ndcn.ox.ac.uk](mailto:verity.westgate@ndcn.ox.ac.uk)17  
18 8 Tatjana Petrinic Oxford University Hospital NHS Trust [tatjana.petrinic@bodleian.ox.ac.uk](mailto:tatjana.petrinic@bodleian.ox.ac.uk)19  
20 9 Julie Darbyshire University of Oxford [Julie.darbyshire@ndcn.ox.ac.uk](mailto:Julie.darbyshire@ndcn.ox.ac.uk)21  
22 10 Peter Watkinson Associate Professor University of Oxford [peter.watkinson@ndcn.ox.ac.uk](mailto:peter.watkinson@ndcn.ox.ac.uk)

23 11

24  
25 12  
26 13 **“Supported by the NIHR Biomedical Research Centre, based at Oxford University Hospitals Trust,**  
27 14 **Oxford and the Wellcome Trust through the Health Innovation Challenge Fund. The views**  
28 15 **expressed are those of the author(s) and not necessarily those of the NHS, the NIHR or the**  
29 16 **Department of Health”**30  
31 1732  
33 18 Word count: 126434  
35 19 Keywords: Failure to rescue, escalation of care, human factors, qualitative, thematic, systematic  
36  
37  
38  
39  
40  
41  
42  
43  
44  
45  
46  
47  
48  
49  
50  
51  
52  
53  
54  
55  
56  
57  
58  
59  
60

## 1 ABSTRACT

### 2 Introduction

3 Failure to rescue is defined as mortality after complications during hospital care. Incidence ranges  
4 10.9% - 13.3% and several national reports such as National Confidential Enquiry into Patient  
5 Outcomes and Death and National Institute of Clinical Excellence CG 50 highlight failure to rescue as  
6 a significant problem for safe patient care.

7 To avoid failure to rescue events, there must be successful escalation of care. Studies indicate that  
8 human factors such as situational awareness, team working, communication, and a culture  
9 promoting safety contribute to avoidance of failure to rescue events. Understanding human factors  
10 is essential to developing work-systems that mitigate barriers and facilitate prompt escalation of  
11 care. This qualitative evidence synthesis will identify and synthesise what is known about the human  
12 factors that affect escalation of care.

### 13 Methods and Analysis

14 We will search MEDLINE (Ovid), EMBASE (Ovid), and CINAHL, between database inception and 2018,  
15 for studies describing human factors affecting failure to rescue and/or care escalation. A search  
16 strategy was developed by two researchers and a medical librarian. Only studies exploring in-  
17 hospital (ward) populations using qualitative data collection methods will be included. Screening will  
18 be conducted by two researchers. We are likely to undertake a thematic synthesis, using the Thomas  
19 and Harden framework. Selected studies will be assessed for quality, rigor and limitations. Two  
20 researchers will extract and thematically synthesise codes using a piloted data extraction tool to  
21 develop analytical themes.

### 22 Ethics and dissemination

23 The qualitative evidence synthesis will use available published literature and no ethical approval is  
24 required. This synthesis will be limited by the quality of studies, rigor and reproducibility of study  
25 findings. Results will be published in a peer-reviewed journal, publicised at conferences and on social  
26 media.

### 27 TRIAL REGISTRATION

28 PROSPERO: (CRD42018104745)

### 29 ARTICLE SUMMARY

30 Strengths and limitations of this study

- 31 • Failure to rescue is a common problem in healthcare with significant effects on patient  
32 mortality
- 33 • For failure to rescue to be avoided, an escalation of care needs to occur. The efficacy of  
34 this can be positively or negatively affected by human factors
- 35 • This protocol ensures a comprehensive and unbiased search and analysis of qualitative  
36 studies exploring this phenomenon using best practice guidelines
- 37 • The results of this review will identify strengths and weaknesses of the literature in this  
38 area
- 39 • This review will highlight potential research direction for future studies and will address  
40 some of the weaknesses identified in published research projects

## 1 INTRODUCTION

2 Failure to rescue is defined as the mortality rate of patients who suffer complications in hospital (1).  
3 The incidence of failure to rescue events varies between hospitals but has been estimated as 10.9%  
4 in high-volume hospitals and 13.3% in low-volume hospitals (2). A proportion of patient deaths  
5 (32%) reported to the National Patient Safety Agency (NSPA) had failures surrounding diagnostic  
6 errors and deteriorations which were not adequately recognised (3). Failure to recognise the need to  
7 rescue patients by providing timely escalation of care is a finding in several national reports such as  
8 National Confidential Enquiry into Patient Outcomes and Death (NCEPOD) (4–7) and NICE CG 50 (8).

9 For ‘failure to rescue’ to be avoided, bedside clinical staff must usually initiate successful escalation  
10 of care (9). This staged process requires detection of deterioration, communication about  
11 deterioration, and medical actions following senior review (4). Many factors affect this process such  
12 as situational awareness, team working, communication, safety culture and leadership (4,10–14).  
13 Understanding these human factors is essential to developing working systems that mitigate barriers  
14 and facilitate prompt escalation of care.

15 The aim of this qualitative evidence synthesis is to map the human factors which affect escalation of  
16 care in the acute hospital setting. It will summarise what is currently understood about the role  
17 human factors play in the delivery of clinical care. Secondly, it will identify gaps in the current  
18 literature and establish strengths and weaknesses of research conducted to date. This will produce  
19 an evidence base from which escalation of care theory could be developed. We will also identify  
20 potential areas for further research in human factors and the escalation of care process.

## 22 Methods and Analysis

### 23 Registration

24 This protocol adheres to the requirements of Preferred reporting items for systematic review and  
25 meta-analysis protocols (PRISMA-P). The protocol was registered with PROSPERO (ref:  
26 CRD42018104745)

### 27 Information sources

28 Literature search strategies will be developed using Medical Subject Headings (MeSH) and text  
29 words related to the human factors involved in the escalation of care for deteriorating patients.

30 The following databases will be searched: MEDLINE (Ovid), EMBASE (Ovid), and CINAHL. Dates  
31 searched will be from database inception to January 2018.

32 Reference lists of eligible studies and relevant reviews will be explored to identify further eligible  
33 studies.

### 34 Search strategy

35 A draft of the search strategy was developed by three of the authors (JE, VW and TP). The proposed  
36 search strategy is shown in the online Supplementary File 1.

### 37 Inclusion Criteria

### 1 *Types of studies*

2 This qualitative evidence synthesis will include qualitative studies which report primary data.  
3 Qualitative studies are defined as those using qualitative data collection and analysis methods.  
4 These can include, but are not limited to, ethnography, interviews, focus groups and human factors  
5 methods. Data analysis is likely (but not limited) to include thematic analysis, grounded theory,  
6 and/or discourse analysis. We will also include grey literature. All studies meeting inclusion criteria  
7 will be included and reviewed.

### 8 *Study focus*

9 Studies must report primary data and describe human factors affecting failure to rescue and  
10 escalation of care. Failure to rescue is defined as patient mortality following complications (1) and  
11 escalation of care is a staged process where patients are identified as 'deteriorating', and that  
12 deterioration is then communicated followed by senior review and medical intervention where  
13 necessary (4). We will include any qualitative study which explores the perspective of patients or  
14 clinical staff (adults or paediatric) and the human factors which affect the escalation of care process.  
15 We are defining human factors as any barrier or facilitator that affects teamwork, tasks, equipment,  
16 workspace, culture, or organisation (15).

### 17 *Setting*

18 The study setting is in-hospital, ward care.

### 19 **Exclusion criteria**

#### 20 *Types of studies*

21 We will exclude systematic reviews, editorials, letters, practice guidelines and abstract-only reports.  
22 We will also exclude protocols without study data.

#### 23 *Phenomenon of interest*

24 We are only interested in real-life scenarios where human factors effects can be studied in the  
25 patient environment. Simulation based studies will be excluded.

#### 26 *Setting*

27 We will exclude studies carried out in the Emergency Department, Critical Care (including the  
28 Intensive Care Unit and Coronary care) or Maternity. These are specialised areas which makes it  
29 challenging to generalise to the ward environment any 'escalation of care' practices identified in  
30 these areas. We will also exclude studies set in palliative care.

#### 31 *Time-frame*

32 No time limitations will be applied

#### 33 *Language*

34 Non-English papers will be excluded.

### 35 **Study selection**

36 Reference lists from all databases will be entered into Covidence software (Covidence systematic  
37 review software, Veritas Health Innovation, Melbourne, Australia. Available at [www.covidence.org](http://www.covidence.org)).  
38 Papers will be de-duplicated. Two authors will independently screen titles and abstracts of identified  
39 papers against the inclusion and exclusion criteria. They will not be blinded to journal titles, study  
40 authors or institutions. If there is disagreement or uncertainty regarding eligibility, the full-text will  
41 be reviewed. We will retrieve full-text for all articles not excluded by the initial screening. Two  
42 authors will independently assess these papers against the inclusion and exclusion criteria outlined  
43 above. Papers which inclusion is uncertain, will be fully reviewed for synthesis suitability. We will

1 resolve disagreements about eligibility by discussion between the screening researchers or a third  
2 party. We will record the reason for excluding studies.

### 3 **Data extraction**

4 Data extraction tools will be developed and piloted before the review takes place. Extracted data will  
5 be entered into Excel (Microsoft Office 2016). Initial coding will be documented with NVivo [NVivo  
6 qualitative data analysis Software; QSR International Pty Ltd. Version 10, 2014]. Two reviewers will  
7 independently extract a selection data from the texts to ensure validity of results. Any discrepancies  
8 within the data collection phase will be resolved by discussion between reviewers or a third party.

#### 9 *Data items extracted*

10 We will extract the following data from each included publication (refer to Table. 1 for full data  
11 details). The data extraction method has been piloted with a sample selection of papers and valid  
12 data have been obtained.

13 *Table 1- Anticipated data to be extracted*

| Study Characteristics                                                                                                                                                                                                                       | Patient/Participant demographics                                                                                        | Study setting                                                                                                   | Themes                                                    | Rigor                                                                                                                    |
|---------------------------------------------------------------------------------------------------------------------------------------------------------------------------------------------------------------------------------------------|-------------------------------------------------------------------------------------------------------------------------|-----------------------------------------------------------------------------------------------------------------|-----------------------------------------------------------|--------------------------------------------------------------------------------------------------------------------------|
| <ul style="list-style-type: none"> <li>• Author</li> <li>• Date of study</li> <li>• Study Type</li> <li>• Methodology</li> <li>• Country of study</li> <li>• Data collection methods</li> <li>• Journal</li> <li>• Data analyses</li> </ul> | <ul style="list-style-type: none"> <li>• Age</li> <li>• Patient group</li> <li>• In-patient characterisation</li> </ul> | <ul style="list-style-type: none"> <li>• Level of care</li> <li>• Hospital Type</li> <li>• Education</li> </ul> | <ul style="list-style-type: none"> <li>• Codes</li> </ul> | <ul style="list-style-type: none"> <li>• Strengths</li> <li>• Weaknesses</li> <li>• Reporting guidelines used</li> </ul> |

### 15 **Quality Assessment**

16 The CASP qualitative checklist (Critical Appraisal Skills Programme) will be used to assess credibility,  
17 transferability, dependability and confirmability. This checklist is an extensive and comprehensive  
18 tool commonly used in qualitative study assessment (16,17). As part of the CASP assessment the  
19 authors will explore the potential for reporting bias within the studies and biases will be reported in  
20 studies' limitations. Two researchers will discuss each study and a consensus will be reached to  
21 include or exclude.

#### 22 **Assessment of confidence in synthesised findings**

23 We will apply the Confidence in the Evidence from Reviews of Qualitative research (GRADE-CERQual)  
24 criteria to judge confidence in synthesised findings (18). We will apply the CERQual criteria to each  
25 study finding, assessing for methodological limitations, relevance, coherence and adequacy of data.  
26 This method will generate a Summary of Qualitative of Study Findings (SoQF) table, providing a  
27 transparent method with which to assess included studies and results (18).

### 28 **Data Analysis**

1  
2  
3  
4 1 This review aims to explore relevant theory and map barriers and facilitators to escalation of care for  
5 2 which thematic synthesis is well suited (17). We are likely to undertake a thematic synthesis, using  
6 3 the Thomas and Harden framework (19). This framework supports data extraction from anywhere  
7 4 within the paper, and is not confined to the results alone. The three stages of the framework are:  
8 5 coding findings from included studies, categorisation of codes into descriptive themes, and  
9 6 categorisation of descriptive themes into analytical themes (19). Stage one involves line by line  
10 7 coding of data, where each sentence is allocated a code. Stage two involves categorising each coded  
11 8 sentence into descriptive, broader themes. The final stage involves generating analytical themes, or  
12 9 'going beyond' the findings of the initial study, which relate to the fixed or emerging research  
13 10 question. Whilst we have been explicit at this point as to the anticipated framework, it is also  
14 11 justifiable for this to change once the search has been conducted (20).

16 12 NVivo software will be used to code the original text from papers. Using this software will facilitate  
17 13 analysis for this evidence synthesis and will be used to record decisions (by audit trail) of coding.  
18 14 Codes relating to human factors and escalation of care will be identified from anywhere within the  
19 15 papers, and tables will be used to record descriptive and analytical themes. Key codes, descriptive  
20 16 themes and analytical themes will be presented in the results. We will use the enhancing  
21 17 transparency in reporting the synthesis of qualitative research (ENTREQ) guidelines to report  
22 18 findings (21).

### 25 19 **Patient and Public Involvement (PPI)**

26 20 A patient representative (TD) has read and provided feedback on the protocol. As a result, some  
27 21 points have been clarified and medical "jargon" removed.  
28  
29  
30  
31

### 32 23 **Ethics and dissemination**

34 24 The proposed evidence synthesis will use published literature and therefore no ethical approval is  
35 25 required. This publication will be limited by the quality of studies available and the rigor and  
36 26 reproducibility of study findings. Original studies included in the review could themselves be limited  
37 27 and it may be difficult to assess the researcher involvement and their individual bias. The two  
38 28 researchers carrying out screening for this review come from different professional backgrounds,  
39 29 limiting interpretation bias when assessing the studies for inclusion. A recognised assessment tool  
40 30 will be used to determine study quality. Using NVivo to code studies will aid transparency and  
41 31 demonstrate a clear strategy for theme identification. An audit trail kept throughout the process,  
42 32 will detail decisions made and methodological steps taken.

45 33 The results from this review will be published and made freely available. A number of social media  
46 34 techniques (including Twitter, Facebook, and our research group website) will be used to promote  
47 35 the protocol, final paper and results. We will also aim to attend at least one conference to present  
48 36 findings from this work.  
49  
50  
51  
52  
53  
54  
55  
56  
57  
58  
59  
60





- 1  
2  
3 1 <http://linkinghub.elsevier.com/retrieve/pii/S0039606014000476>  
4  
5  
6 2 10. Chua WL, Mackey S, Ng EKC, Liaw SY. Front line nurses' experiences with deteriorating ward  
7  
8 3 patients: A qualitative study. *Int Nurs Rev*. 2013;60(4):501–9.  
9  
10  
11 4 11. Mochizuki K, Shintani R, Mori K, Sato T, Sakaguchi O, Takeshige K, et al. Importance of  
12  
13 5 respiratory rate for the prediction of clinical deterioration after emergency department  
14  
15 6 discharge: a single-center, case-control study. *Acute Med Surg [Internet]*. 2016;1–7. Available  
16  
17 7 from: <http://doi.wiley.com/10.1002/ams2.252>  
18  
19  
20  
21 8 12. Brady PW, Goldenhar LM. A qualitative study examining the influences on situation  
22  
23 9 awareness and the identification, mitigation and escalation of recognised patient risk. *BMJ*  
24  
25 10 *Qual Saf [Internet]*. 2014 [cited 2017 May 9];23:153–61. Available from:  
26  
27 11 <http://dx.doi.org/10.1136/bmjqs-2012-001747>  
28  
29  
30 12 13. Shearer B, Marshall S, Buist MD, Finnigan M, Kitto S, Hore T, et al. What stops hospital clinical  
31  
32 13 staff from following protocols? An analysis of the incidence and factors behind the failure of  
33  
34 14 bedside clinical staff to activate the rapid response system in a multi-campus Australian  
35  
36 15 metropolitan healthcare service. *BMJ Qual Saf [Internet]*. 2012;21(7):569–75. Available from:  
37  
38 16 <http://qualitysafety.bmj.com/lookup/doi/10.1136/bmjqs-2011-000692>  
39  
40  
41  
42 17 14. Donohue LA, Endacott R. Track, trigger and teamwork: Communication of deterioration in  
43  
44 18 acute medical and surgical wards Background. *Intensive Crit Care Nurs [Internet]*. 2010 [cited  
45  
46 19 2017 May 9];26. Available from: [http://ac.els-cdn.com/S0964339709001074/1-s2.0-](http://ac.els-cdn.com/S0964339709001074/1-s2.0-S0964339709001074-main.pdf?_tid=42ebcfc6-34aa-11e7-a31b-00000aacb362&acdnat=1494329333_5d17d9cc08ce503e7b37debb709eaa99)  
47  
48 20 [S0964339709001074-main.pdf?\\_tid=42ebcfc6-34aa-11e7-a31b-](http://ac.els-cdn.com/S0964339709001074/1-s2.0-S0964339709001074-main.pdf?_tid=42ebcfc6-34aa-11e7-a31b-00000aacb362&acdnat=1494329333_5d17d9cc08ce503e7b37debb709eaa99)  
49  
50 21 [00000aacb362&acdnat=1494329333\\_5d17d9cc08ce503e7b37debb709eaa99](http://ac.els-cdn.com/S0964339709001074/1-s2.0-S0964339709001074-main.pdf?_tid=42ebcfc6-34aa-11e7-a31b-00000aacb362&acdnat=1494329333_5d17d9cc08ce503e7b37debb709eaa99)  
51  
52  
53  
54 22 15. *Human Factors in Healthcare Patient Stories*. 2013;  
55  
56  
57 23 16. Greenhalgh T. HOW TO READ The basics of evidence based medicine [Internet]. Vol. 315,  
58  
59 24 *British Medical Journal*. 2001. 596-9 p. Available from:  
60



- 1  
2  
3 1 [http://www.pubmedcentral.nih.gov/articlerender.fcgi?artid=2127419&tool=pmcentrez&ren](http://www.pubmedcentral.nih.gov/articlerender.fcgi?artid=2127419&tool=pmcentrez&rendertype=abstract)  
4  
5 2 [dertype=abstract](http://www.pubmedcentral.nih.gov/articlerender.fcgi?artid=2127419&tool=pmcentrez&rendertype=abstract)  
6  
7  
8 3 17. Tacconelli E. Systematic reviews: CRD's guidance for undertaking reviews in health care  
9  
10 4 [Internet]. Vol. 10, The Lancet Infectious Diseases. 2010. 226 p. Available from:  
11  
12 5 <http://linkinghub.elsevier.com/retrieve/pii/S1473309910700657>  
13  
14  
15 6 18. Lewin S, Booth A, Glenton C, Munthe-Kaas H, Rashidian A, Wainwright M, et al. Applying  
16  
17 GRADE-CERQual to qualitative evidence synthesis findings: introduction to the series.  
18 7  
19 Implement Sci [Internet]. 2018 [cited 2018 Dec 17];13(1). Available from:  
20 8  
21 9 <http://creativecommons.org/publicdomain/zero/1.0/>  
22  
23  
24  
25 10 19. Barnett-Page E, Thomas J. Methods for the synthesis of qualitative research: A critical review.  
26  
27 11 BMC Med Res Methodol. 2008;9(1).  
28  
29  
30 12 20. Dixon-Woods M. Using framework-based synthesis for conducting reviews of qualitative  
31  
32 13 studies. BMC Med. 2011;9:9–10.  
33  
34  
35 14 21. Enhancing transparency in reporting the synthesis of qualitative research: ENTREQ | The  
36  
37 EQUATOR Network [Internet]. [cited 2018 Dec 14]. Available from: [http://www.equator-](http://www.equator-network.org/reporting-guidelines/entreq/)  
38 15  
39 [network.org/reporting-guidelines/entreq/](http://www.equator-network.org/reporting-guidelines/entreq/)  
40 16  
41  
42  
43 17  
44  
45  
46 18  
47  
48 19  
49  
50 20  
51  
52 21  
53  
54 22  
55  
56 23  
57  
58 24  
59  
60 25  
26

1  
2  
3  
4  
5  
6  
7  
8  
9  
10  
11  
12  
13  
14  
15  
16  
17  
18  
19  
20  
21  
22  
23  
24  
25  
26  
27  
28  
29  
30  
31  
32  
33  
34  
35  
36  
37  
38  
39  
40  
41  
42  
43  
44  
45  
46  
47  
48  
49  
50  
51  
52  
53  
54  
55  
56  
57  
58  
59  
60

1  
2  
3  
4  
5  
6  
7  
8  
9

For peer review only

## 1 **Contributions**

2 PW is the guarantor. JE was responsible for the overall design of the QES. JE and VW drafted the  
3 manuscript. TP and JE developed the search strategy. PW and JD provided QES and qualitative  
4 expertise. All authors read, provided feedback and approved the final manuscript.

## 5 **Declarations**

### 6 *Acknowledgement*

7 We would like to thank patient representative, TD for his contribution to this work.

### 8 *Funding*

9 This QES protocol is funded by NIHR Biomedical Research Centre, based at Oxford University  
10 Hospitals Trust, Oxford and the Department of Health and Wellcome Trust through the Health  
11 Innovation Challenge Fund.

12 This publication presents independent research commissioned by the Health Innovation Challenge  
13 Fund (HICF-R9-524; WT-103703/Z/14/Z), a parallel funding partnership between the Department of  
14 Health and Wellcome Trust. The views expressed in this publication are those of the author(s) and  
15 not necessarily those of the Department of Health or Wellcome Trust. This work was also supported  
16 by the NIHR Biomedical Research Centre, Oxford.

### 17 *Availability of data and materials*

18 Not applicable

### 19 *Consent for publication*

20 Not applicable

### 21 *Ethics approval and consent to participate*

22 Not applicable

### 23 *Competing interests*

24 The authors declare that they have no competing interests.

25

**Supplementary File 1** (Draft Search Strategy for MEDLINE)

1. HOSPITALIZATION/
2. TERTIARY CARE CENTERS/
3. (ward or wards).ab,ti.
4. (inhospital or inpatient\* or "in hospital").ab,ti.
5. (hospitalised or hospitalized).ab,ti.
6. "general hospital".ab,ti.
7. "nurs\* staff\* ".ab,ti.
8. "in patient".ab,ti.
9. bedside.ab,ti.
10. outreach.ab,ti.
11. 1 or 2 or 3 or 4 or 5 or 6 or 7 or 8 or 9 or 10
12. FAILURE TO RESCUE,HEALTH CARE/
13. "fail\* to rescue ".ab,ti.
14. VITAL SIGNS/
15. MONITORING,PHYSIOLOGIC/
16. "vital sign\* ".ab,ti.
17. (track and trigger).ab,ti.
- 18."early warning".ab,ti.
19. "warning score\* ".ab,ti.
20. "early sign\* ".ab,ti.
21. "warning system\* ".ab,ti.
22. (deteriorat\* or escalat\*).ab,ti.
23. triggering.ab,ti.
24. HOSPITAL RAPID RESPONSE TEAM/
25. "rapid response".ab,ti.
26. "critical care outreach".ab,ti.
27. 12 or 13 or 14 or 15 or 16 or 17 or 18 or 19 or 20 or 21 or 22 or 23 or 24 or 25 or 26
28. MEDICAL ERROR/
29. DELAYED DIAGNOSIS/
30. COMMUNICATION/
31. PATIENT CARE TEAMS/

1  
2  
3 32. PATIENT SAFETY/  
4

5 33. ORGANIZATIONAL CULTURE/  
6

7 34. LEADERSHIP/  
8

9 35. "human factor\* ".af.  
10

11 36. "human error\* ".af.  
12

13 37. "clinical error\* ".af.  
14

15 38. "medical error\* ".af.  
16

17 39. "protocol adherence".af.  
18

19 40. "protocol compliance".af.  
20

21 41. "teamwork\* ".af.  
22

23 42. communication.af.  
24

25 43. ("socio cultural" or sociocultural).af.  
26

27 44. "situation awareness".af.  
28

29 45. "organisational culture".af.  
30

31 46. "organizational culture".af.  
32

33 47. "safety culture".af.  
34

35 48. "patient safety".af.  
36

37 49. leadership.af.  
38

39 50. "root cause analysis".af.  
40

41 51. 28 or 29 or 30 or 31 or 32 or 33 or 34 or 35 or 36 or 37 or 38 or 39 or 40 or 41 or 42 or 43 or 44  
42 or 45 or 46 or 47 or 48 or 49 or 50  
43

44 52. 11 and 27 and 51  
45  
46  
47  
48  
49  
50  
51  
52  
53  
54  
55  
56  
57  
58  
59  
60

**PRISMA-P (Preferred Reporting Items for Systematic review and Meta-Analysis Protocols) 2015 checklist: recommended items to address in a systematic review protocol\***

| Section and topic                 | Item No | Checklist item                                                                                                                                                                                                                | Page No                              |
|-----------------------------------|---------|-------------------------------------------------------------------------------------------------------------------------------------------------------------------------------------------------------------------------------|--------------------------------------|
| <b>ADMINISTRATIVE INFORMATION</b> |         |                                                                                                                                                                                                                               |                                      |
| Title:                            |         |                                                                                                                                                                                                                               |                                      |
| Identification                    | 1a      | Identify the report as a protocol of a systematic review                                                                                                                                                                      | Pg 1 Line 3                          |
| Update                            | 1b      | If the protocol is for an update of a previous systematic review, identify as such                                                                                                                                            | n/a                                  |
| Registration                      | 2       | If registered, provide the name of the registry (such as PROSPERO) and registration number                                                                                                                                    | Pg 2 Line 29<br>Pg 3 Lines 25-26     |
| Authors:                          |         |                                                                                                                                                                                                                               |                                      |
| Contact                           | 3a      | Provide name, institutional affiliation, e-mail address of all protocol authors; provide physical mailing address of corresponding author                                                                                     | Pg 1 Lines 6-10                      |
| Contributions                     | 3b      | Describe contributions of protocol authors and identify the guarantor of the review                                                                                                                                           | Pg 11 Lines 1-5                      |
| Amendments                        | 4       | If the protocol represents an amendment of a previously completed or published protocol, identify as such and list changes; otherwise, state plan for documenting important protocol amendments                               | n/a                                  |
| Support:                          |         |                                                                                                                                                                                                                               |                                      |
| Sources                           | 5a      | Indicate sources of financial or other support for the review                                                                                                                                                                 | Pg 1 Lines 13-16<br>Pg 11 Lines 7-15 |
| Sponsor                           | 5b      | Provide name for the review funder and/or sponsor                                                                                                                                                                             | Pg 1 Lines 13-16<br>Pg 11 Lines 7-15 |
| Role of sponsor or funder         | 5c      | Describe roles of funder(s), sponsor(s), and/or institution(s), if any, in developing the protocol                                                                                                                            | n/a                                  |
| <b>INTRODUCTION</b>               |         |                                                                                                                                                                                                                               |                                      |
| Rationale                         | 6       | Describe the rationale for the review in the context of what is already known                                                                                                                                                 | Pg 2 Lines 2-12<br>Pg 3 Lines 1-14   |
| Objectives                        | 7       | Provide an explicit statement of the question(s) the review will address with reference to participants, interventions, comparators, and outcomes (PICO)                                                                      | Pg 3 Lines 15-20                     |
| <b>METHODS</b>                    |         |                                                                                                                                                                                                                               |                                      |
| Eligibility criteria              | 8       | Specify the study characteristics (such as PICO, study design, setting, time frame) and report characteristics (such as years considered, language, publication status) to be used as criteria for eligibility for the review | Pg 3 Lines 34-36<br>Pg 4 Lines 1-18  |

|                                    |     |                                                                                                                                                                                                                                                     |                                    |
|------------------------------------|-----|-----------------------------------------------------------------------------------------------------------------------------------------------------------------------------------------------------------------------------------------------------|------------------------------------|
| Information sources                | 9   | Describe all intended information sources (such as electronic databases, contact with study authors, trial registers or other grey literature sources) with planned dates of coverage                                                               | Pg 3 Lines 27-32                   |
| Search strategy                    | 10  | Present draft of search strategy to be used for at least one electronic database, including planned limits, such that it could be repeated                                                                                                          | Supplementary File 1               |
| <b>Study records:</b>              |     |                                                                                                                                                                                                                                                     |                                    |
| Data management                    | 11a | Describe the mechanism(s) that will be used to manage records and data throughout the review                                                                                                                                                        | Pg 4 Lines 36-38<br>Pg 5 Lines 4-8 |
| Selection process                  | 11b | State the process that will be used for selecting studies (such as two independent reviewers) through each phase of the review (that is, screening, eligibility and inclusion in meta-analysis)                                                     | Pg 4 Lines 38-44                   |
| Data collection process            | 11c | Describe planned method of extracting data from reports (such as piloting forms, done independently, in duplicate), any processes for obtaining and confirming data from investigators                                                              | Pg 5 Lines 4-12                    |
| Data items                         | 12  | List and define all variables for which data will be sought (such as PICO items, funding sources), any pre-planned data assumptions and simplifications                                                                                             | Pg 4 Lines 7-10(in table)          |
| Outcomes and prioritization        | 13  | List and define all outcomes for which data will be sought, including prioritization of main and additional outcomes, with rationale                                                                                                                | Pg 4 Lines 9-10                    |
| Risk of bias in individual studies | 14  | Describe anticipated methods for assessing risk of bias of individual studies, including whether this will be done at the outcome or study level, or both; state how this information will be used in data synthesis                                | Pg 5 Lines 15-28                   |
| Data synthesis                     | 15a | Describe criteria under which study data will be quantitatively synthesised                                                                                                                                                                         | n/a                                |
|                                    | 15b | If data are appropriate for quantitative synthesis, describe planned summary measures, methods of handling data and methods of combining data from studies, including any planned exploration of consistency (such as I <sup>2</sup> , Kendall's τ) | n/a                                |
|                                    | 15c | Describe any proposed additional analyses (such as sensitivity or subgroup analyses, meta-regression)                                                                                                                                               | n/a                                |
|                                    | 15d | If quantitative synthesis is not appropriate, describe the type of summary planned                                                                                                                                                                  | n/a                                |
| Meta-bias(es)                      | 16  | Specify any planned assessment of meta-bias(es) (such as publication bias across studies, selective reporting within studies)                                                                                                                       | Pg 5 Lines 15-28                   |
| Confidence in cumulative evidence  | 17  | Describe how the strength of the body of evidence will be assessed (such as GRADE)                                                                                                                                                                  | Pg 5 Lines 22-28                   |

**\*It is strongly recommended that this checklist be read in conjunction with the PRISMA-P Explanation and Elaboration (cite when available) for important clarification on the items. Amendments to a review protocol should be tracked and dated. The copyright for PRISMA-P (including checklist) is held by the PRISMA-P Group and is distributed under a Creative Commons Attribution Licence 4.0.**

*From: Shamseer L, Moher D, Clarke M, Ghersi D, Liberati A, Petticrew M, Shekelle P, Stewart L, PRISMA-P Group. Preferred reporting items for systematic review and meta-analysis protocols (PRISMA-P) 2015: elaboration and explanation. BMJ. 2015 Jan 2;349(jan02 1):g7647.*
